# Supplementary material for: Prospective multicentre observational cohort to assess quality of life, functional outcomes and cost-effectiveness following minimally invasive surgical techniques for rectal cancer in ‘dedicated centres’ in the Netherlands (VANTAGE trial): a protocol
Source: HighWire-hosted journal article supplement (doi:10.1136/bmjopen-2021-057640), 2022-08-01
Supplement: bmjopen-2021-057640supp001_data_supplement.pdf [file bmjopen-2021-057640supp001_data_supplement.pdf]

**Supplementary file A**

Approval from the regional medical ethical committee of the University Medical Centre Groningen (METC UMCG) has been obtained by VANTAGE for the collection of DCRA data regarding baseline characteristics of patients not included in PLCRC.

Approval from the regional medical ethical committee of the University Medical Centre Utrecht (METC UMCU) has been obtained by PLCRC for collection of questionnaires and data for patients included in PLCRC.

Approval from the local medical ethical committees of all participating centres has been obtained, these include:

Department of Surgery, Amphia, Breda, The Netherlands

Department of Surgery, Catharina Hospital, Eindhoven, The Netherlands

Department of Surgery, Deventer Ziekenhuis, Deventer, The Netherlands

Department of Surgery, Diaconessenhuis, Utrecht, The Netherlands

Department of Surgery, Elisabeth Twee Steden, Tilburg, The Netherlands

Department of Surgery, St. Franciscus Gasthuis, Rotterdam, The Netherlands

Department of Surgery, Gelderse Vallei, Ede, The Netherlands

Department of Surgery, Gelre, Apeldoorn, The Netherlands

Department of Surgery, Haga Hospital, Den Haag, The Netherlands

Department of Surgery, Isala, Zwolle, The Netherlands

Department of Surgery, Jeroen Bosch Ziekenhuis, Den Bosch, The Netherlands

Department of Surgery, Laurentius Hospital, Roermond, The Netherlands

Department of Surgery, Maastricht University Medical Centre, Maastricht, The Netherlands

Department of Surgery, MC Leeuwarden, Leeuwarden, The Netherlands

Department of Radiology, Meander Medical Centre, Amersfoort, The Netherlands

Department of Surgery, Onze Lieve Vrouwen Hospital, Amsterdam, The Netherlands

Department of Surgery, Rijnstate, Arnhem, The Netherlands

Department of Surgery, Spaarne Gasthuis, Haarlem, The Netherlands

Department of Surgery, St. Antonius, Nieuwegein, The Netherlands

Department of Surgery, Tergooi, Hilversum, The Netherlands

Department of Surgery, University Medical Centre, Amsterdam, The Netherlands

Department of Surgery, University Medical Centre, Groningen, The Netherlands

Department of Surgery, University Medical Centre, Utrecht, The Netherlands

Department of Surgery, VU university Medical Centre, Amsterdam

Department of Surgery, Zorggroep Twente, Almelo, The Netherlands

Department of Surgery, Zuyderland Hospital, Heerlen, The Netherlands
